# Supplementary material for: Validation of the German version of the Neck Disability Index (NDI)
Source: PubMed Central journal article supplement (PMC3999938; doi:10.1186/1471-2474-15-91), 2014-03-19
Supplement: 1471-2474-15-91-S1.pdf [file 1471-2474-15-91-S1.pdf]

VP: \_\_\_\_\_

Datum: \_\_\_\_\_

## Neck Disability Index

Dieser Fragebogen wurde entworfen, um Ihnen die Möglichkeit zu geben zu beschreiben, inwieweit *Ihre Nackenschmerzen Ihren Alltag beeinträchtigen*. Bitte beantworten Sie jeden Abschnitt und kreuzen Sie für jeden der folgenden Abschnitte das Kästchen der Antwortmöglichkeit an, die *am besten auf Sie zutrifft*. Auch wenn sich mehrere Sätze in einem Abschnitt auf Ihre Situation beziehen sollten, wählen Sie bitte den einen Satz aus, der Ihre Situation am ehesten beschreibt.

### Schmerzintensität

---

- Ich habe im Moment keine Schmerzen.
- Ich habe im Moment sehr geringe Schmerzen.
- Ich habe im Moment mäßige Schmerzen.
- Ich habe im Moment ziemlich starke Schmerzen.
- Ich habe im Moment sehr starke Schmerzen.
- Ich habe im Moment die stärksten Schmerzen, die ich mir vorstellen kann.

### Persönliche Körperpflege (Waschen, Ankleiden, etc.)

---

- Ich kann meine Körperpflege erledigen, ohne dass dies zusätzliche Schmerzen verursacht.
- Ich kann meine Körperpflege erledigen, aber dies verursacht mir zusätzliche Schmerzen.
- Das Erledigen der Körperpflege ist schmerzhaft, und ich bin dabei langsam und vorsichtig.
- Ich brauche etwas Hilfe, aber ich kann den größten Teil meiner Körperpflege selbst besorgen.
- Ich brauche täglich Hilfe bei den meisten Verrichtungen der Körperpflege.
- Ich ziehe mich nicht an, wasche mich nur mit Mühe und bleibe im Bett.

### Heben

---

- Ich kann schwere Gegenstände ohne zusätzliche Schmerzen heben.
- Ich kann schwere Gegenstände heben, aber dies verursacht zusätzliche Schmerzen.
- Meine Schmerzen hindern mich daran, schwere Gegenstände vom Boden aufzuheben. Aber ich kann schwere Gegenstände heben, wenn sie günstig positioniert sind (z.B. auf dem Tisch).
- Meine Schmerzen hindern mich daran, schwere Gegenstände zu heben. Aber ich kann leichte bis mittelschwere Gegenstände heben, wenn sie günstig positioniert sind.
- Ich kann nur sehr leichte Gegenstände heben.
- Ich kann überhaupt nichts heben oder tragen.

### Lesen

---

- Ich kann lesen, soviel ich will, ohne Nackenschmerzen zu bekommen.
- Ich kann lesen, soviel ich will, aber ich bekomme davon leichte Nackenschmerzen.
- Ich kann lesen, soviel ich will, aber ich bekomme davon mäßige Nackenschmerzen.
- Ich kann wegen mäßiger Nackenschmerzen nicht soviel lesen, wie ich will.
- Ich kann wegen starker Nackenschmerzen kaum lesen.
- Ich kann überhaupt nicht mehr lesen.

## Kopfschmerzen

---

- Ich habe überhaupt keine Kopfschmerzen.
- Ich habe leichte Kopfschmerzen, die unregelmäßig auftreten.
- Ich habe mäßige Kopfschmerzen, die unregelmäßig auftreten.
- Ich habe mäßige Kopfschmerzen, die regelmäßig auftreten.
- Ich habe starke Kopfschmerzen, die regelmäßig auftreten.
- Ich habe die meiste Zeit Kopfschmerzen.

## Konzentration

---

- Ich kann mich, wenn ich will, ohne Schwierigkeiten voll konzentrieren.
- Ich kann mich, wenn ich will, mit leichten Schwierigkeiten voll konzentrieren.
- Ich habe ziemliche Schwierigkeiten mich zu konzentrieren, wenn ich es will.
- Ich habe große Schwierigkeiten mich zu konzentrieren, wenn ich es will.
- Ich habe sehr große Schwierigkeiten mich zu konzentrieren, wenn ich es will.
- Ich kann mich überhaupt nicht konzentrieren.

## Arbeit

---

- Ich kann soviel Arbeit erledigen, wie ich möchte.
- Ich kann nur meine übliche Arbeit erledigen, aber nicht mehr.
- Ich kann den größten Teil meiner üblichen Arbeit erledigen, aber nicht mehr.
- Ich kann meine übliche Arbeit nicht erledigen
- Ich kann kaum eine Arbeit erledigen.
- Ich kann überhaupt keine Arbeit erledigen.

## Autofahren

---

- Ich kann Auto fahren, ohne Nackenschmerzen zu bekommen.
- Ich kann Auto fahren, solange ich will, mit leichten Nackenschmerzen.
- Ich kann Auto fahren, solange ich will, mit mäßigen Nackenschmerzen.
- Ich kann wegen mäßiger Nackenschmerzen nicht Auto fahren, solange ich will.
- Ich kann wegen starker Nackenschmerzen kaum Auto fahren.
- Ich kann überhaupt nicht Auto fahren.

## Schlafen

---

- Ich habe keine Schlafprobleme.
- Mein Schlaf ist kaum gestört (weniger als 1 Stunde schlaflos).
- Mein Schlaf ist leicht gestört (1-2 Stunden schlaflos).
- Mein Schlaf ist mäßig gestört (2-3 Stunden schlaflos).
- Mein Schlaf ist stark gestört (3-5 Stunden schlaflos).
- Mein Schlaf ist komplett gestört (5-7 Stunden schlaflos).

## Freizeit

---

- Ich kann alle meine Freizeitaktivitäten ohne Nackenschmerzen ausüben.
- Ich kann, wenn auch mit einigen Nackenschmerzen, alle meine Freizeitaktivitäten ausüben.
- Wegen Nackenschmerzen kann ich die meisten, aber nicht alle meiner üblichen Freizeitaktivitäten ausüben.
- Ich kann wegen Nackenschmerzen nur einige meiner Freizeitaktivitäten ausüben.
- Ich kann wegen Nackenschmerzen kaum irgendwelche Freizeitaktivitäten ausüben.
- Ich kann überhaupt keine Freizeitaktivitäten ausüben.
